# Supplementary material for: Cancer stem cell-related gene expression as a potential biomarker of response for first-in-class imipridone ONC201 in solid tumors
Source: PLoS One. 2017 Aug 2;12(8):e0180541. doi: 10.1371/journal.pone.0180541 (PMC5540272; doi:10.1371/journal.pone.0180541)
Supplement: S7 Table — (XLSX) [file pone.0180541.s007.xlsx]

## Sheet: Sheet1
							Prabhu VV et al Table S7
		Gene Name	P Value	D Statistic
		HES7	0.003	0.254
		TCF3	0.00211	0.253
		1D1	0.00257	0.18
		CD44	0.0306	0.173
		TCF7L2	0.0712	0.162
		ALDH7A1	0.118	0.154
		FZD4	0.169	0.145
		KLF9	0.159	0.143
		ID2	0.233	0.136
		ABCB5	0.293	0.122
		CCNB1	0.289	0.119
		ID3	0.394	0.115
		WNT16	0.565	0.107
		FZD2	0.65	0.0902
